# Supplementary material for: Fabrication of robust protein-based foams with multifunctionality by manipulating intermolecular interactions
Source: Royal Society of Chemistry journal article supplement (doi:10.1039/d1gc02390j), 2021-01-01
Supplement: d1gc02390j1.pdf [file d1gc02390j1.pdf]

## Supporting Information

### **Fabrication of robust protein-based foams with multifunctionality by manipulating intermolecular interactions**

Xingxing Shen<sup>a,b,c</sup> and Qing Guo<sup>\*a,b,c</sup>

*<sup>a</sup>College of Food Science and Nutritional Engineering, China Agricultural University, Beijing 100083, China*

*<sup>b</sup>National Engineering Research Center for Fruit and Vegetables Processing, China Agricultural University, Beijing 100083, China*

*<sup>c</sup>Key Laboratory of Fruits and Vegetables Processing, Ministry of Agriculture and Rural Affairs, China Agricultural University, Beijing 100083, China*

\*Corresponding author: Qing Guo

Email address: [qing.guo1115@gmail.com](mailto:qing.guo1115@gmail.com); mailing address: College of Food Science and Nutritional Engineering, China Agricultural University, Beijing 100083, China

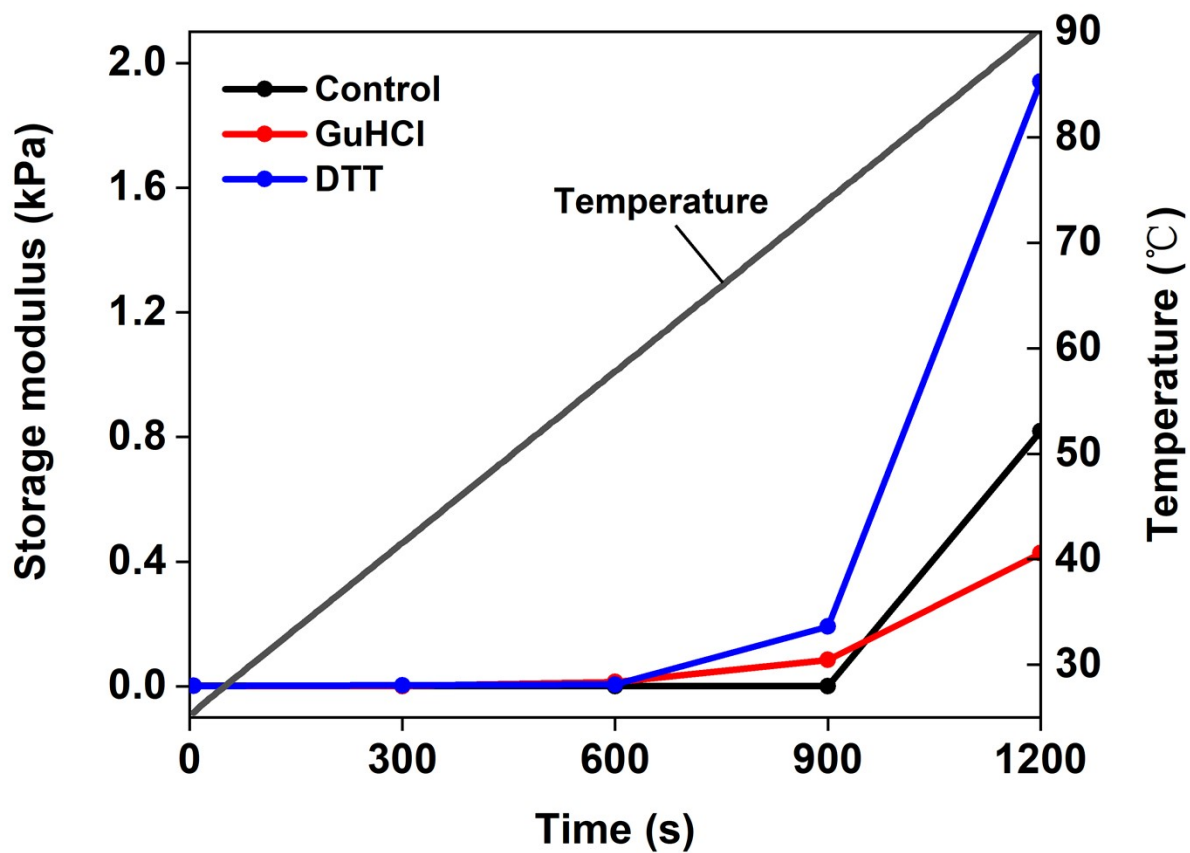

**Fig. S1** Shear modulus as a function of time during the heating process (25–90 °C) of whey protein emulsions. The control, guanidinium hydrochloride (GuHCl), and dithiothreitol (DTT) samples contained 200 mM NaCl, 200 mM NaCl + 2 M GuHCl, and 200 mM NaCl + 10 mM DTT, respectively.

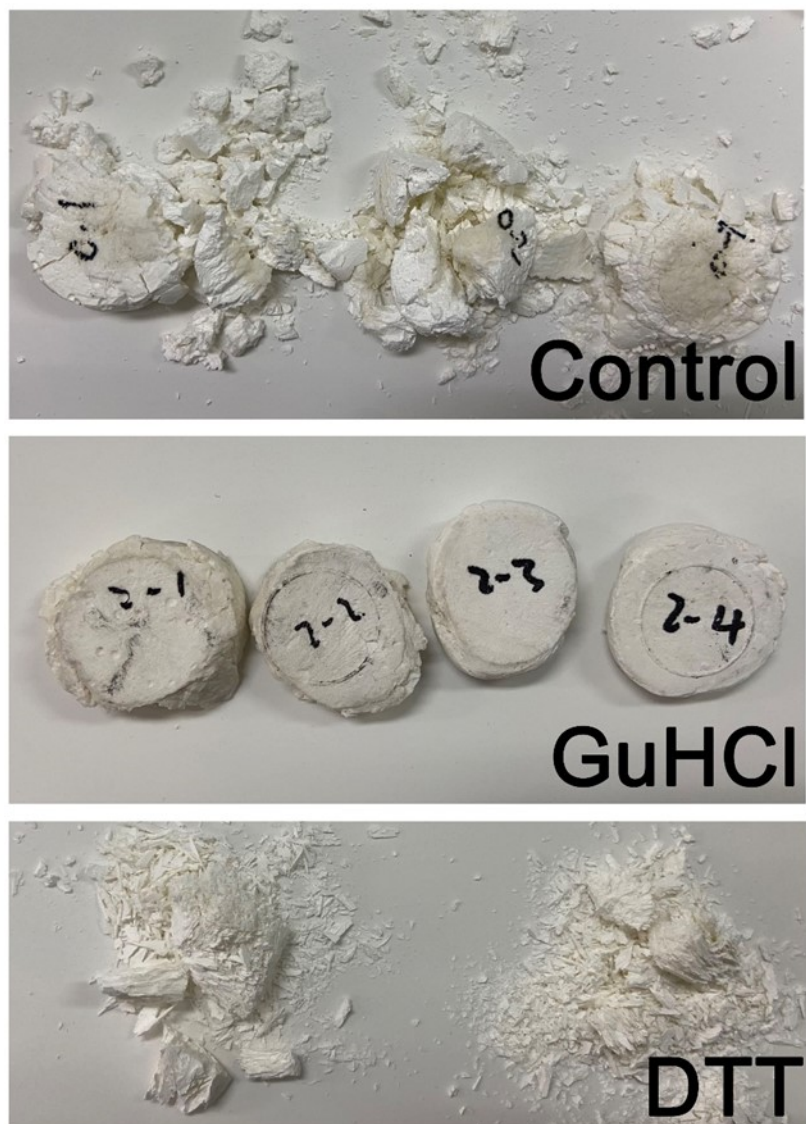

**Fig. S2** Photographs of foams upon 50% deformation during the compression test. The control, guanidinium hydrochloride (GuHCl), and dithiothreitol (DTT) samples contained 200 mM NaCl, 200 mM NaCl + 2 M GuHCl, and 200 mM NaCl + 10 mM DTT, respectively.

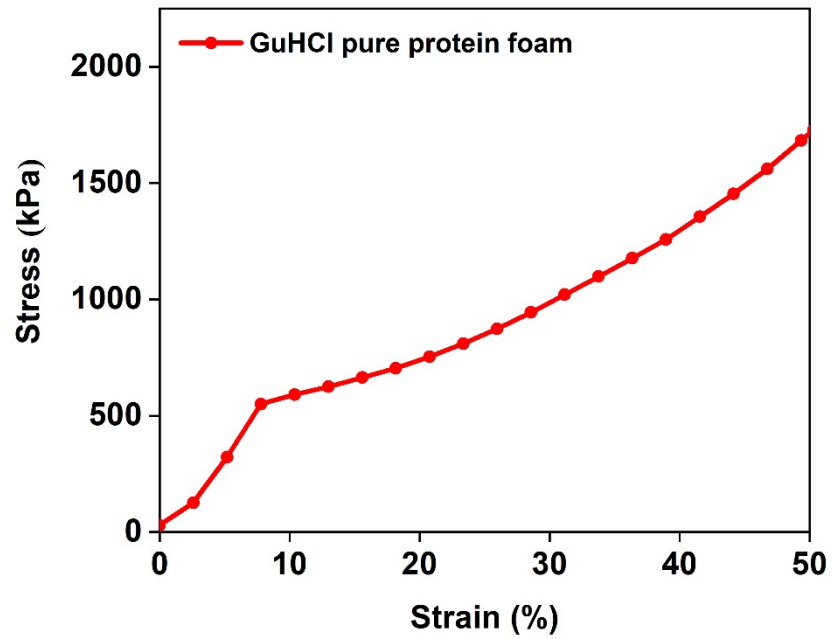

**Fig. S3** Stress–strain curve of the guanidinium hydrochloride (GuHCl) pure protein foam during the compression test. The sample contained 200 mM NaCl + 2 M GuHCl.

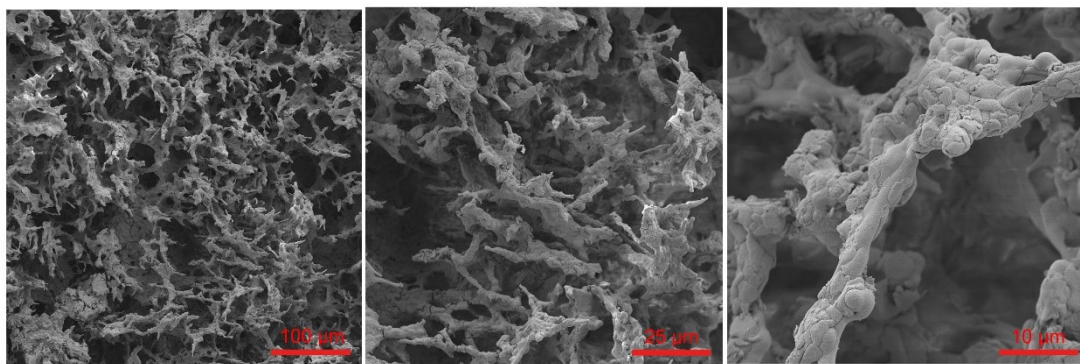

**Fig. S4** Scanning electron micrographs of the guanidinium hydrochloride (GuHCl) pure protein foam at different magnifications.

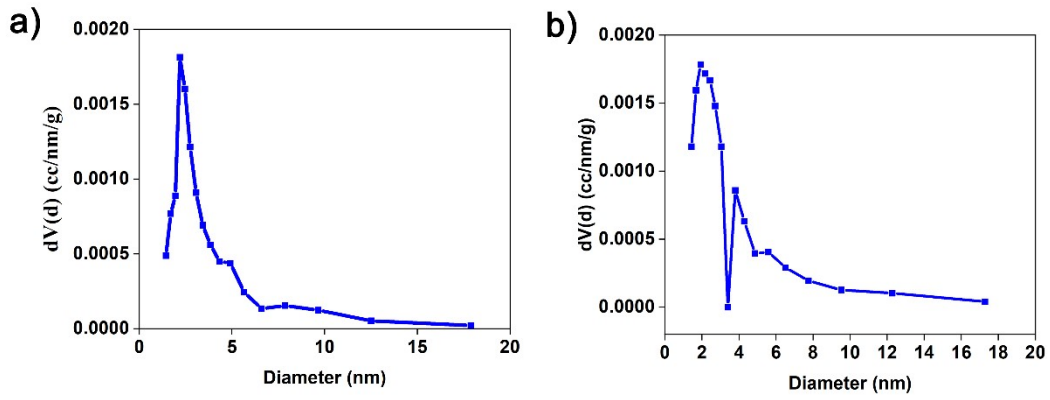

**Fig. S5** Pore size distribution curves of the guanidinium hydrochloride (GuHCl) foam obtained from (a) the adsorption process and (b) the desorption process.

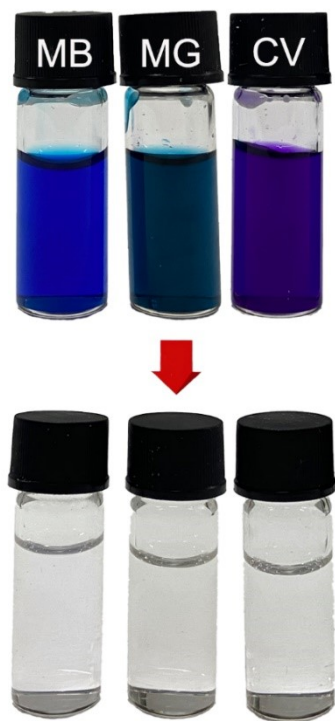

**Fig. S6** Photographs of 2 mL of various dye solutions (100 mg/L) before and after filtration. MB, methylene blue; MG, methylene green; CV, crystal violet.

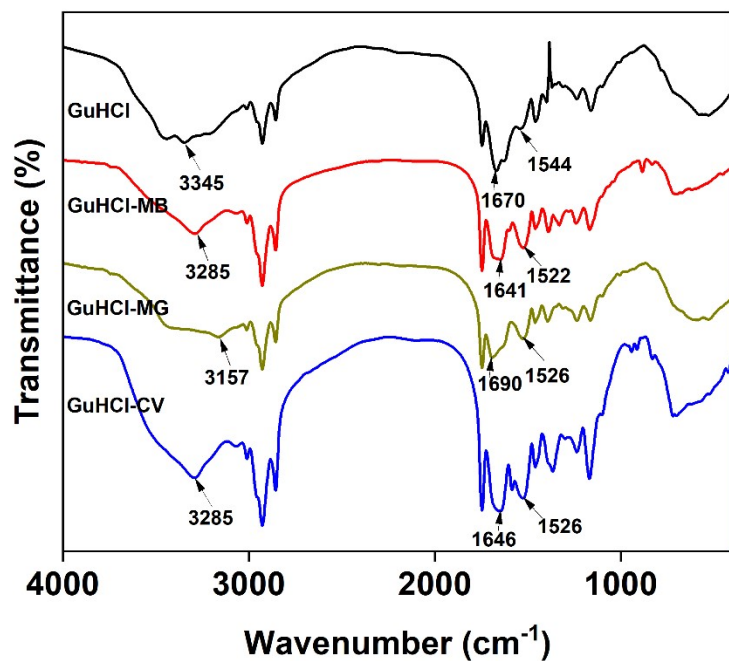

**Fig. S7** Fourier transform infrared spectra of the guanidinium hydrochloride (GuHCl) foam before and after MB, MG, and CV adsorption, respectively. MB, methylene blue; MG, methylene green; CV, crystal violet.



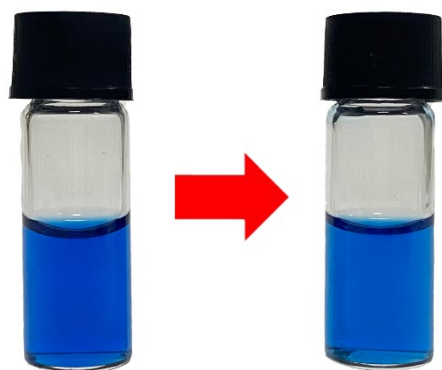

**Fig. S8** Photographs of 1 mL of Indigo Carmine solution (100 mg/L) before and after filtration.

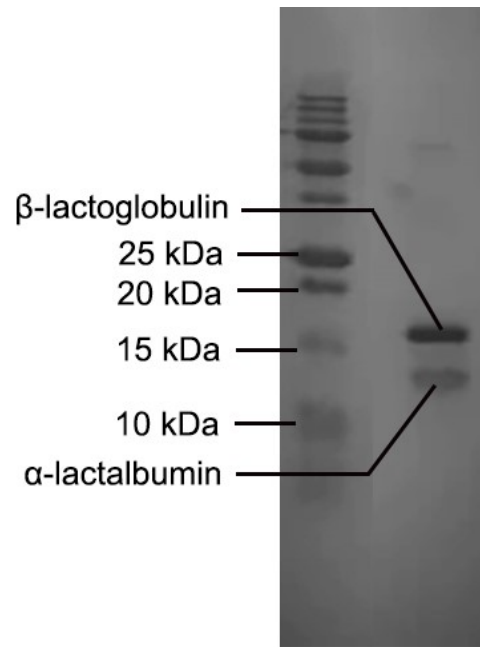

**Fig. S9** Sodium dodecyl sulfate-polyacrylamide gel electrophoresis profiles of whey protein isolate.  $\alpha$ -lactalbumin and  $\beta$ -lactoglobulin correspond to the bands at molecular weights of 14.4 and 18.1 kDa, respectively.

**Table S1** Comparison of mechanical properties of various emulsion-filled protein gels

| Materials                                                                           | Testing methods           | Modulus (kPa) | Fracture stress (kPa) | Fracture strain (%) | Ref.                  |
|-------------------------------------------------------------------------------------|---------------------------|---------------|-----------------------|---------------------|-----------------------|
| 9 wt% whey protein, 25 wt% sunflower oil                                            | Uniaxial compression test | 50            | 26                    | 57                  | [1]                   |
| 9 wt% casein micelle and sodium caseinate, 25 wt% sunflower oil                     | Uniaxial compression test | 20            | 7                     | 39                  | [1]                   |
| 13 w/v% soybean protein isolate, 10 v/v% soybean oil                                | Uniaxial compression test | Not measured  | 14                    | 70                  | [2]                   |
| 6 w/v% soybean protein isolate, 20 v/v% soybean oil                                 | Uniaxial compression test | 104           | 8.6                   | 32                  | [3]                   |
| 4.5 w/v% egg white protein, 0.72 w/v% glucono delta-lactone, 10 v/v% grape seed oil | Uniaxial compression test | Not measured  | 18.5                  | 72                  | [4]                   |
| 10 wt% gelatin, 20 wt% medium-chain triglycerides oil                               | Uniaxial compression test | 43            | 38                    | 58                  | [5]                   |
| 10 wt% whey protein, 5 wt% soybean oil droplets                                     | Tensile test              | 42            | 55                    | 147                 | This work (GuHCl gel) |

**Table S2** Mechanical properties of the emulsion-filled whey protein foam during the compression test

| Sample <sup>1</sup> | Young's modulus (MPa) | Compressive strength <sup>2</sup> (MPa) |
|---------------------|-----------------------|-----------------------------------------|
| Control             | 2.23 ± 0.39           | 0.53 ± 0.06                             |
| GuHCl               | 16.86 ± 3.62          | 1.84 ± 0.07                             |
| DTT                 | 0.35 ± 0.04           | 0.51 ± 0.04                             |

<sup>1</sup> The control, guanidinium hydrochloride (GuHCl), and dithiothreitol (DTT) samples contained 200 mM NaCl, 200 mM NaCl + 2 M GuHCl, and 200 mM NaCl + 10 mM DTT, respectively.

<sup>2</sup> The value is the stress at 50% strain.

**Table S3** Comparison of preparation and mechanical properties of various protein-based aerogels/foams

| Materials                                                                                                               | Hydrogel preparation complexity | Foam preparation method                     | Mechanical properties                                                       | Ref.                   |
|-------------------------------------------------------------------------------------------------------------------------|---------------------------------|---------------------------------------------|-----------------------------------------------------------------------------|------------------------|
| 10% (w/v) whey protein                                                                                                  | Simple                          | Freeze drying                               | Modulus: 2.4 MPa;<br>yield stress: 0.3 MPa;<br>yield strain: 15%            | [6]                    |
| 10% (w/v) whey protein, 2.5% (w/v) alginate, 2.5 wt% clay                                                               | Moderate                        | Freeze drying                               | Modulus: 2.5 MPa<br>Yield stress: < 0.1 MPa;<br>yield strain: < 5%          | [6]                    |
| 4 w/v% silk fibroin, 2 w/v% hyaluronic acid, 1 w/v% heparin, EDC (13.6 mg/mL) <sup>1</sup> , NHS (5 mg/mL) <sup>2</sup> | Complicated                     | Freeze drying, annealing with ethanol vapor | Modulus: 13.1 kPa                                                           | [7]                    |
| 5.3% soybean protein, 2.7% nanofibrillar cellulose                                                                      | Simple                          | Freeze drying                               | Modulus: 4.4 MPa                                                            | [8]                    |
| 10 w/w% protein extracts from canola seed meal                                                                          | Simple                          | Freeze drying                               | Yield stress: < 0.1 MPa;<br>yield strain: < 6%                              | [9]                    |
| 8 w/v% whey protein, 1 w/v% cellulose particles                                                                         | Moderate                        | Freeze drying                               | Modulus: $\approx$ 400 kPa;<br>yield stress: 50 kPa;<br>yield strain: < 25% | [10]                   |
| 10 wt% whey protein, 5 wt% soybean oil droplets                                                                         | Simple                          | Freeze drying                               | Modulus: 16.9 MPa;<br>yield stress: 1.4 MPa;<br>yield strain: 16.5%         | This work (GuHCl foam) |

<sup>1</sup> EDC, 1-ethyl-3-(3-dimethylaminopropyl)carbodiimide hydrochloride.

<sup>2</sup> NHS, N-hydroxysuccinimide.

**Mercury porosimetry.** Mercury intrusion porosimetry was conducted on an AutoPore V 9600 Mercury Porosimeter (Micromeritics Instruments, USA). A 0.12 g sample was put into measurement cells and was measured under the experimental conditions of 27 K, 0.1-61000 psia, and 130° contact angle of mercury on the foam.

**Table S4** Pore characterization results of the GuHCl foam<sup>1</sup>

| Sample             | Surface area and pore size analyzer |                                           |                                        | Mercury porosimetry        |                                   |              |
|--------------------|-------------------------------------|-------------------------------------------|----------------------------------------|----------------------------|-----------------------------------|--------------|
|                    | Average pore size of skeleton (nm)  | Specific surface area (m <sup>2</sup> /g) | Total pore volume (cm <sup>3</sup> /g) | Average pore diameter (μm) | Bulk density (g/cm <sup>3</sup> ) | Porosity (%) |
| GuHCl <sup>2</sup> | 6.04                                | 2.60                                      | 3.90 × 10 <sup>-3</sup>                | 16.05                      | 0.31                              | 69.53        |

<sup>1</sup>The GuHCl samples contained 200 mM NaCl + 2 M GuHCl.

<sup>2</sup>GuHCl, guanidinium hydrochloride.

**Table S5** Comparison of precursors, crosslinkers, and organic solvents used in various biopolymer-based aerogels/foams, and their preparation complexity

| Precursors                                                   | Crosslinkers                                                          | Organic solvents               | Preparation complexity | Ref.                   |
|--------------------------------------------------------------|-----------------------------------------------------------------------|--------------------------------|------------------------|------------------------|
| Soy flour                                                    | Formaldehyde and tannin                                               | Ethylene glycol, methanol      | Complicated            | [11]                   |
| Gelatin powders/TiO <sub>2</sub> /branched polyethyleneimine | Glutaraldehyde                                                        | None                           | Moderate               | [12]                   |
| Cellulose nanofibril                                         | Methylene diphenyl diisocyanate and triethylamine                     | <i>tert</i> -butanol, acetone  | Complicated            | [13]                   |
| Chitosan                                                     | Formaldehyde                                                          | Methanol, acetone, acetic acid | Moderate               | [14–16]                |
| Periodate-oxidized cellulose                                 | None                                                                  | Octylamine                     | Complicated            | [17]                   |
| Gelatin and attapulgit                                       | Glutaraldehyde                                                        | Ethanol                        | Moderate               | [18]                   |
| Cellulose                                                    | 3-(glycidyloxypropyl) trimethoxysilane and branched-polyethyleneimine | None                           | Simple                 | [19]                   |
| Nanocellulose                                                | Polyethyleneimine and hexamethylenediamine                            | None                           | Complicated            | [20]                   |
| Gelatin and cellulose nanofibers                             | Epichlorohydrin                                                       | None                           | Simple                 | [21]                   |
| Whey protein                                                 | Soybean oil droplets                                                  | None                           | Simple                 | This work (GuHCl foam) |

## References

1. L. Oliver, E. Scholten and G. A. van Aken, *Food Hydrocoll.*, 2015, 43, 299–310.
2. K. H. Kim, J. M. S. Renkema and T. van Vliet, *Food Hydrocoll.*, 2001, 15, 295–302.
3. C. H. Tang, L. Chen and E. A. Foegeding, *J. Agric. Food Chem.*, 2011, 59, 4071–4077.
4. F. Alavi, Z. Emam-Djomeh, M. Salami and M. Mohammadian, *Int. J. Biol. Macromol.*, 2020, 153, 523–532.
5. G. Sala, T. van Vliet, M. Cohen Stuart, F. de Velde and G. A. van Aken, *Food Hydrocoll.*, 2009, 23, 1853–1863.
6. H.-B. Chen, Y.-Z. Wang and D. A. Schiraldi, *Eur. Polym. J.*, 2013, 49, 3387–3391.
7. M. Najberg, M. H. Mansor, T. Taillé, C. Bouré, R. Molina-Peña, F. Boury, J. L. Cenis, E. Garcion and C. Alvarez-Lorenzo, *Carbohydr. Polym.*, 2020, 237, 116107.
8. J. C. Arboleda, M. Hughes, L. A. Lucia, J. Laine, K. Ekman and O. J. Rojas, *Cellulose*, 2013, 20, 2417–2426.
9. S. E. Fitzpatrick, S. Deb-Choudhury, S. Ranford and M. P. Staiger, *J. Mater. Sci.*, 2020, 55, 4848–4863.
10. M. Ahmadi, A. Madadlou and A. A. Saboury, *Food Chem.*, 2016, 196, 1016–1022.
11. G. Amaral-Labat, L. Grishechko, A. Szczurek, V. Fierro, A. Pizzi, B. Kuznetsov and A. Celzard, *Green Chem.*, 2012, 14, 3099–3106.
12. J. Jiang, Q. Zhang, X. Zhan and F. Chen, *Chem. Eng. J.*, 2019, 358, 1539–1551.
13. F. Jiang and Y.-L. Hsieh, *ACS Appl. Mater. Interfaces*, 2017, 9, 2825–2834.



14. S. Takeshita, A. Sadeghpour, W. J. Malfait, A. Konishi, K. Otake and S. Yoda, *Biomacromolecules*, 2019, 20, 2051–2057.
15. S. Takeshita and S. Yoda, *Nanoscale*, 2017, 9, 12311–12315.
16. S. Takeshita and S. Yoda, *Chem. Mater.*, 2015, 27, 7569–7572.
17. N. T. Cervin, E. Johansson, P. A. Larsson and L. Wågberg, *ACS Appl Mater. Interfaces*, 2016, 8, 11682–11689.
18. J. Zhu, F. Zhao, R. Xiong, T. Peng, Y. Ma, J. Hu, L. Xie and C. Jiang, *Compos. A - Appl. Sci. Manuf.*, 2020, 138, 106040.
19. C. Tang, P. Brodie, Y. Li, N. J. Grishkewich, M. Brunsting and K. C. Tam, *Chem. Eng. J.*, 2020, 392, 124821.
20. L. Hossain, V. S. Raghuwanshi, J. Tanner, C.-M. Wu, O. Kleinerman, Y. Cohen and G. Garnier, *J. Colloid Interface Sci.*, 2020, 568, 234–244.
21. A. Mirtaghavi, A. Baldwin, N. Tanideh, M. Zarei, R. Muthuraj, Y. Cao, G. Zhao, J. Geng, H. Jin and J. Luo, *Int. J. Biol. Macromol.*, 2020, 164, 1949–1959.
